# Supplementary material for: miR-200c Modulates the Pathogenesis of Radiation-Induced Oral Mucositis
Source: Oxid Med Cell Longev. 2019 Jun 27;2019:2352079. doi: 10.1155/2019/2352079 (PMC6620860; doi:10.1155/2019/2352079)
Supplement: Supplementary 3 — Table S3: clonogenic survival parameters fitting the data to a multitarget model. [file 2352079.f3.docx]

**Table S3**. Clonogenic survival parameters fitting the data to a multitarget model.

| *D*0 *D*q SER |  |  |  |
| --- | --- | --- | --- |
| NHK/Control 2.01 0.41 - |  |  |  |
| MHK/miR-200c 1.91 1.76 0.23 |  |  |  |

MiR-200c inhibition decreased radiorensitivity in NHK. NHK/Control and NHK/miR-200c- were cultured in 6 well plates for 24 hours, and then irradiated with the indicated doses. After 10 days, the colonies were counted. The equation of SF = 1-(1-e-D/D0)N was applied to calculate the cellular radiosensitivity (mean lethal dose, D0) and the capacity for sublethal damage repair (quasithreshold dose, Dq). Those values were then used to calculate the sensitization enhancement ratio (SER). MiR-200c inhibition increased the plating efficiency of the treated cells to fold of the NHK/Control, and decreased the radiosensitivity of NHK, with a SER of 0.23.
